# Supplementary figures and images for: Full-resolution HLA and KIR gene annotations for human genome assemblies
Source: HighWire-hosted journal article supplement (doi:10.1101/gr.278985.124), 2024-06-05

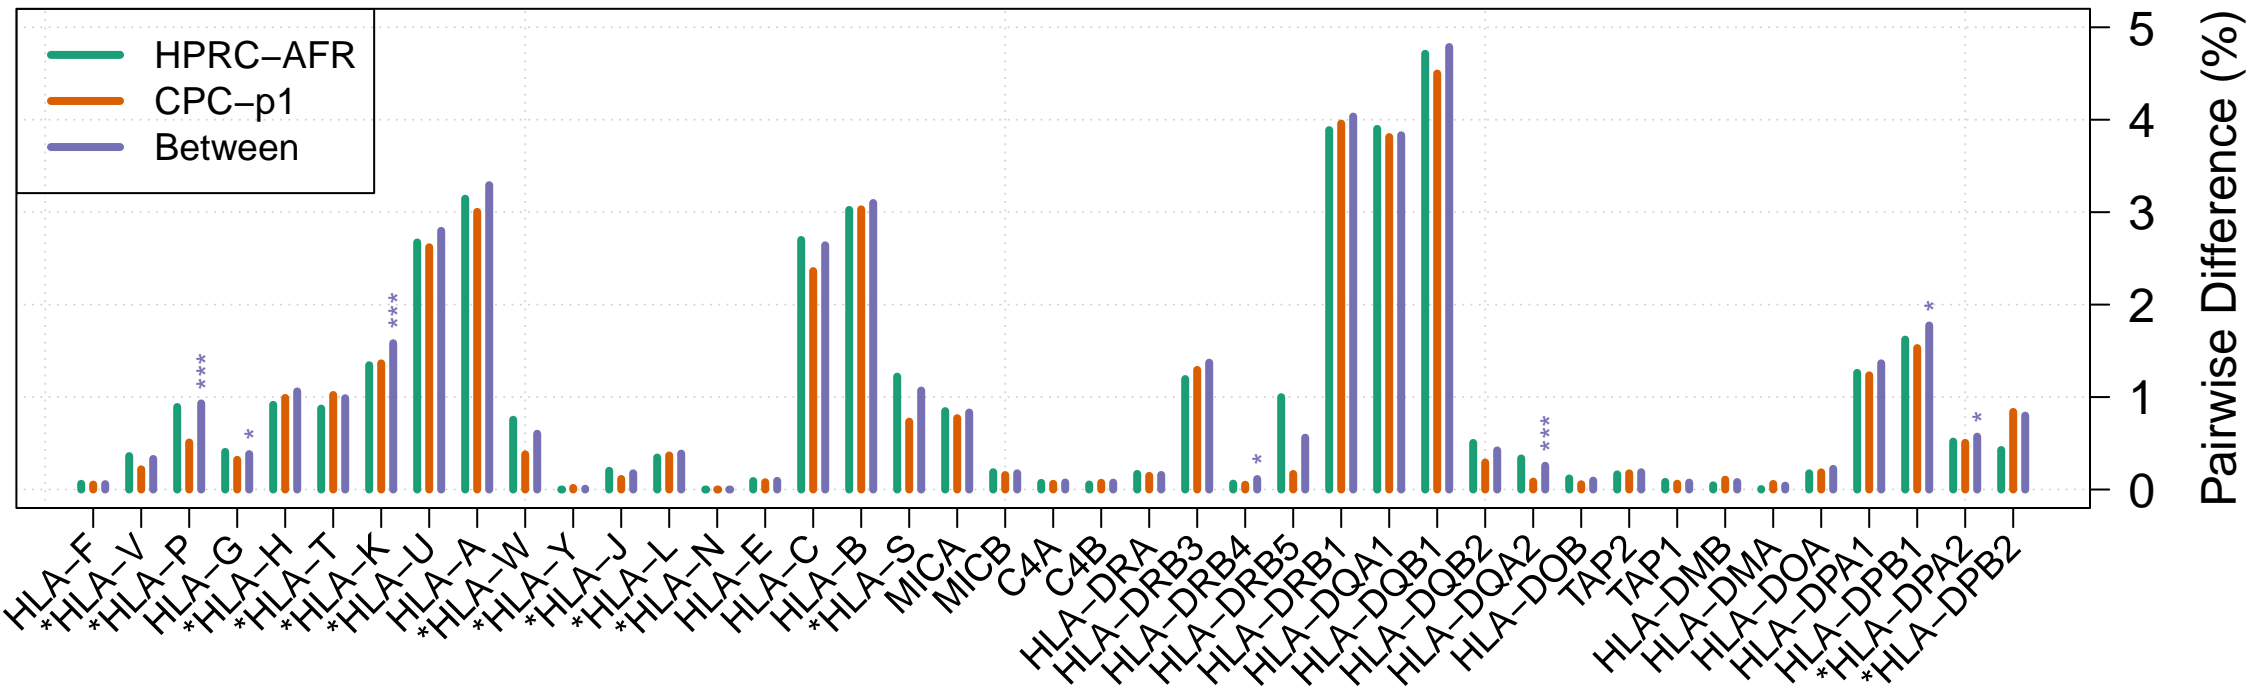

Supplement: Supplemental_code_r3.zip [file hla.pdf › codes/gene-divergence/plot/hla.pdf]

# CPC-P1 – HLA haplotypes

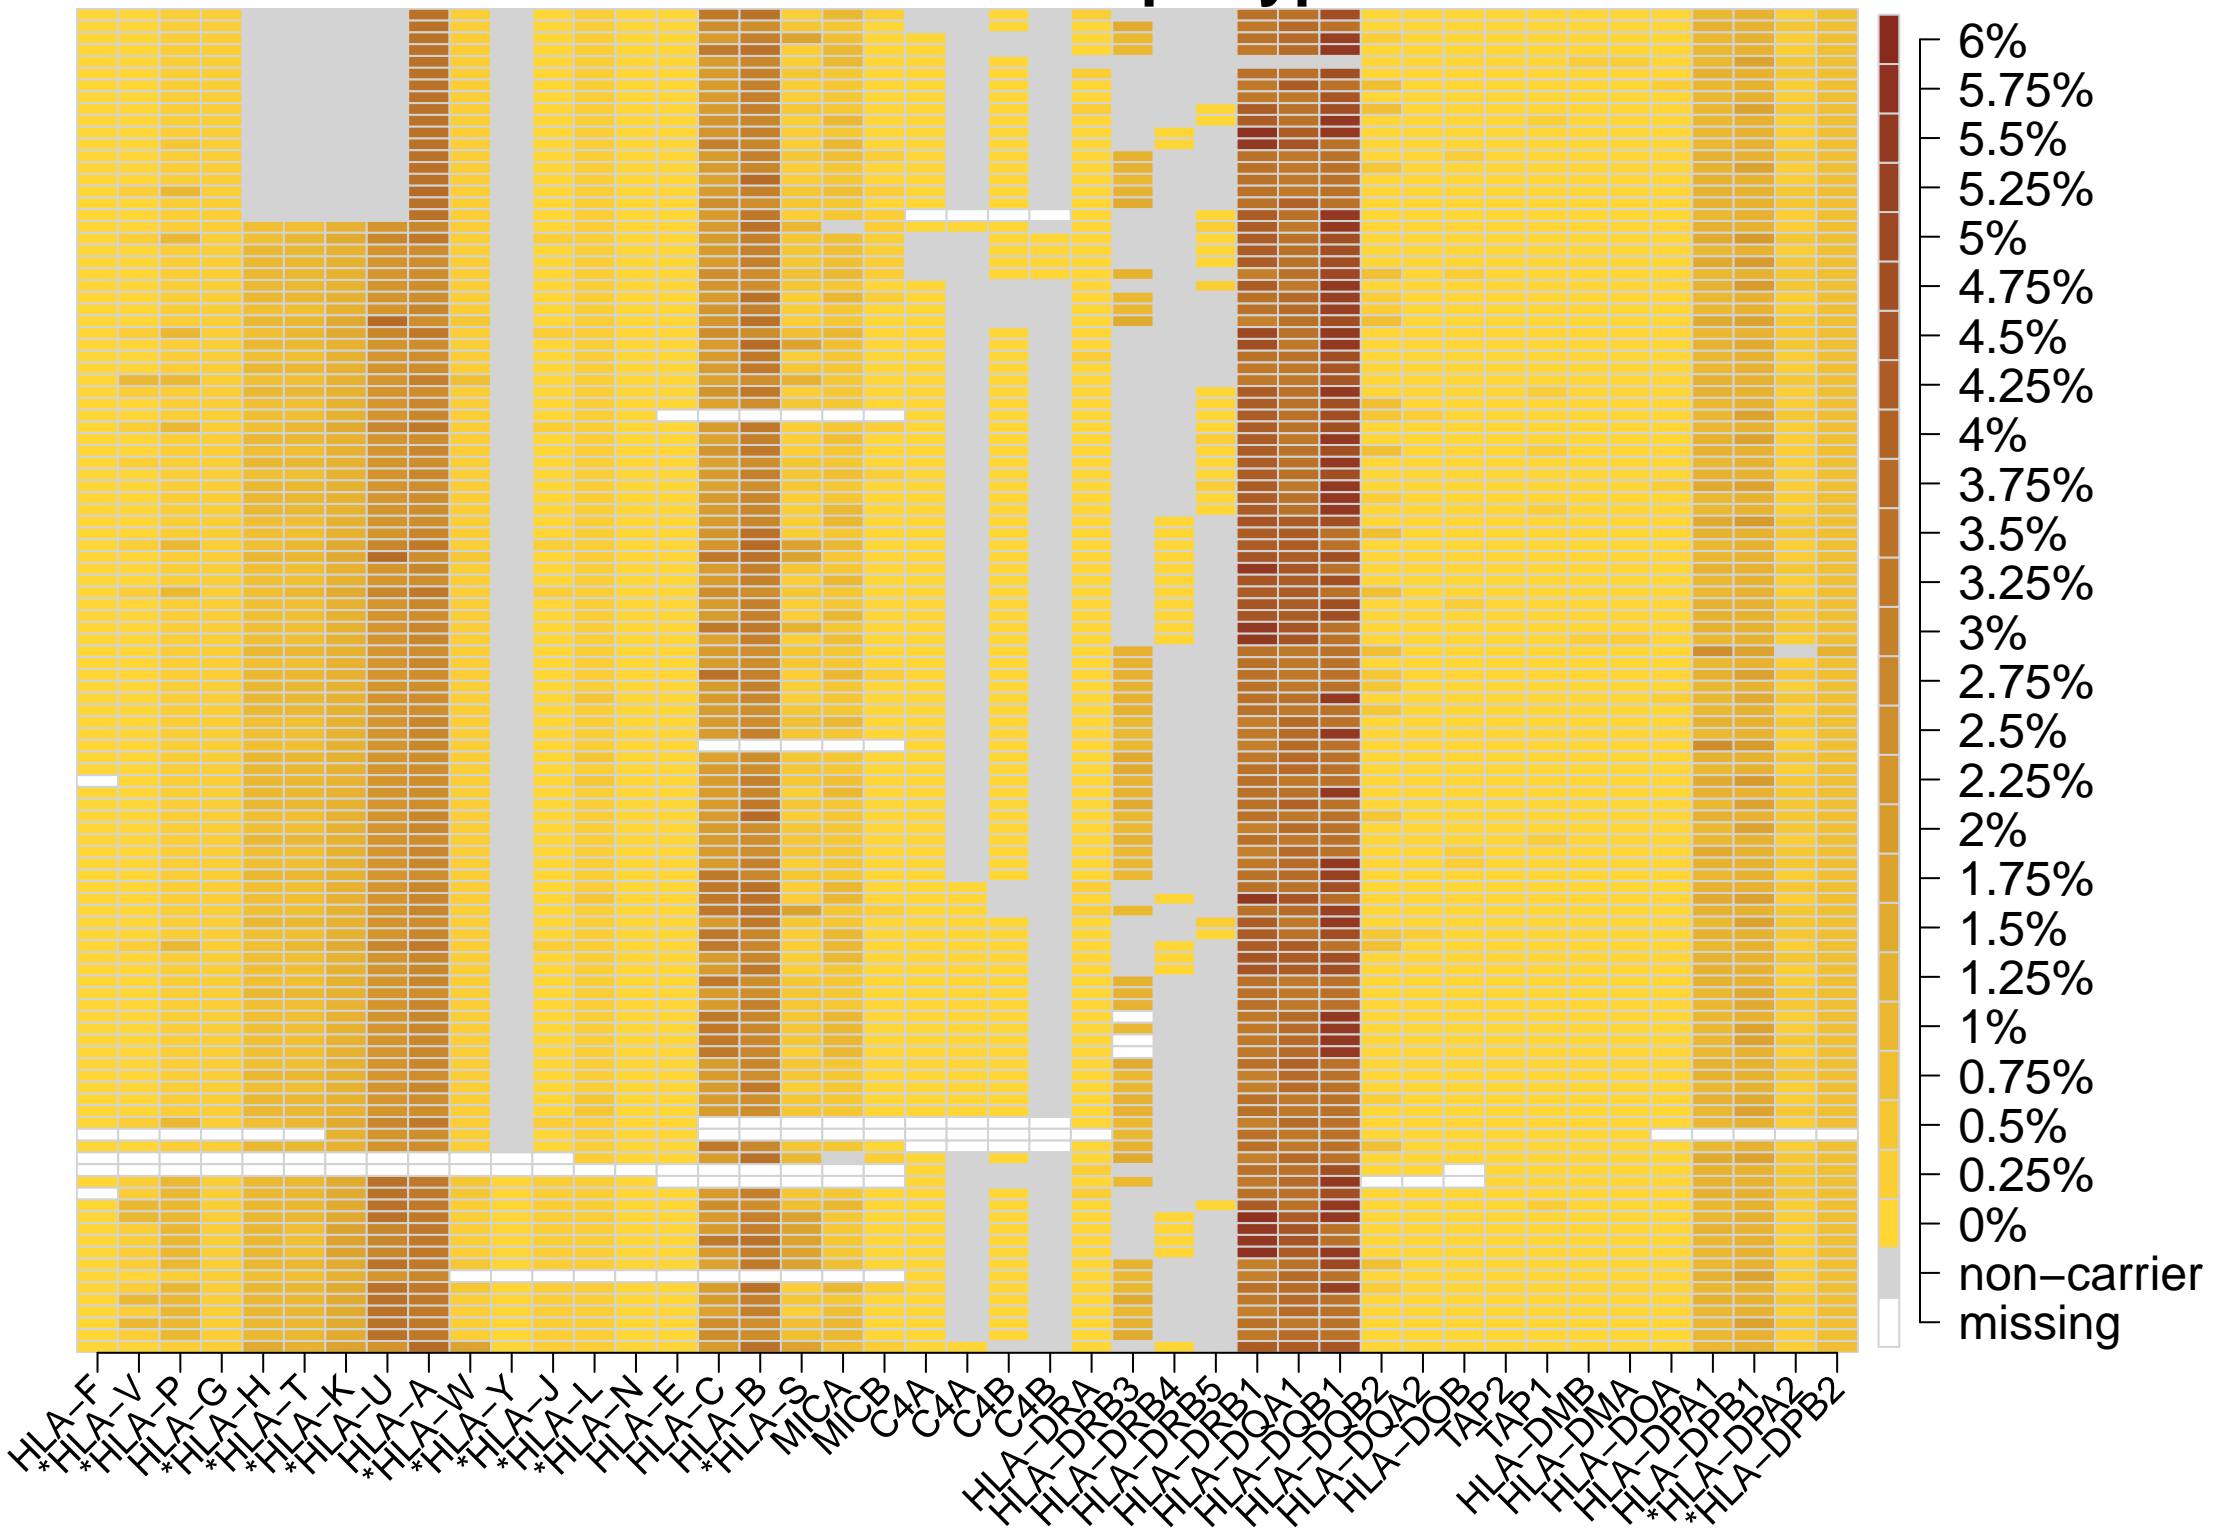

Supplement: Supplemental_code_r3.zip [file cpc-p1.HLA.cds.div.compact.pdf › codes/hap-tab-plot/cpc-p1.HLA.cds.div.compact.pdf]

CPC-P1 – HLA CDS relative divergence

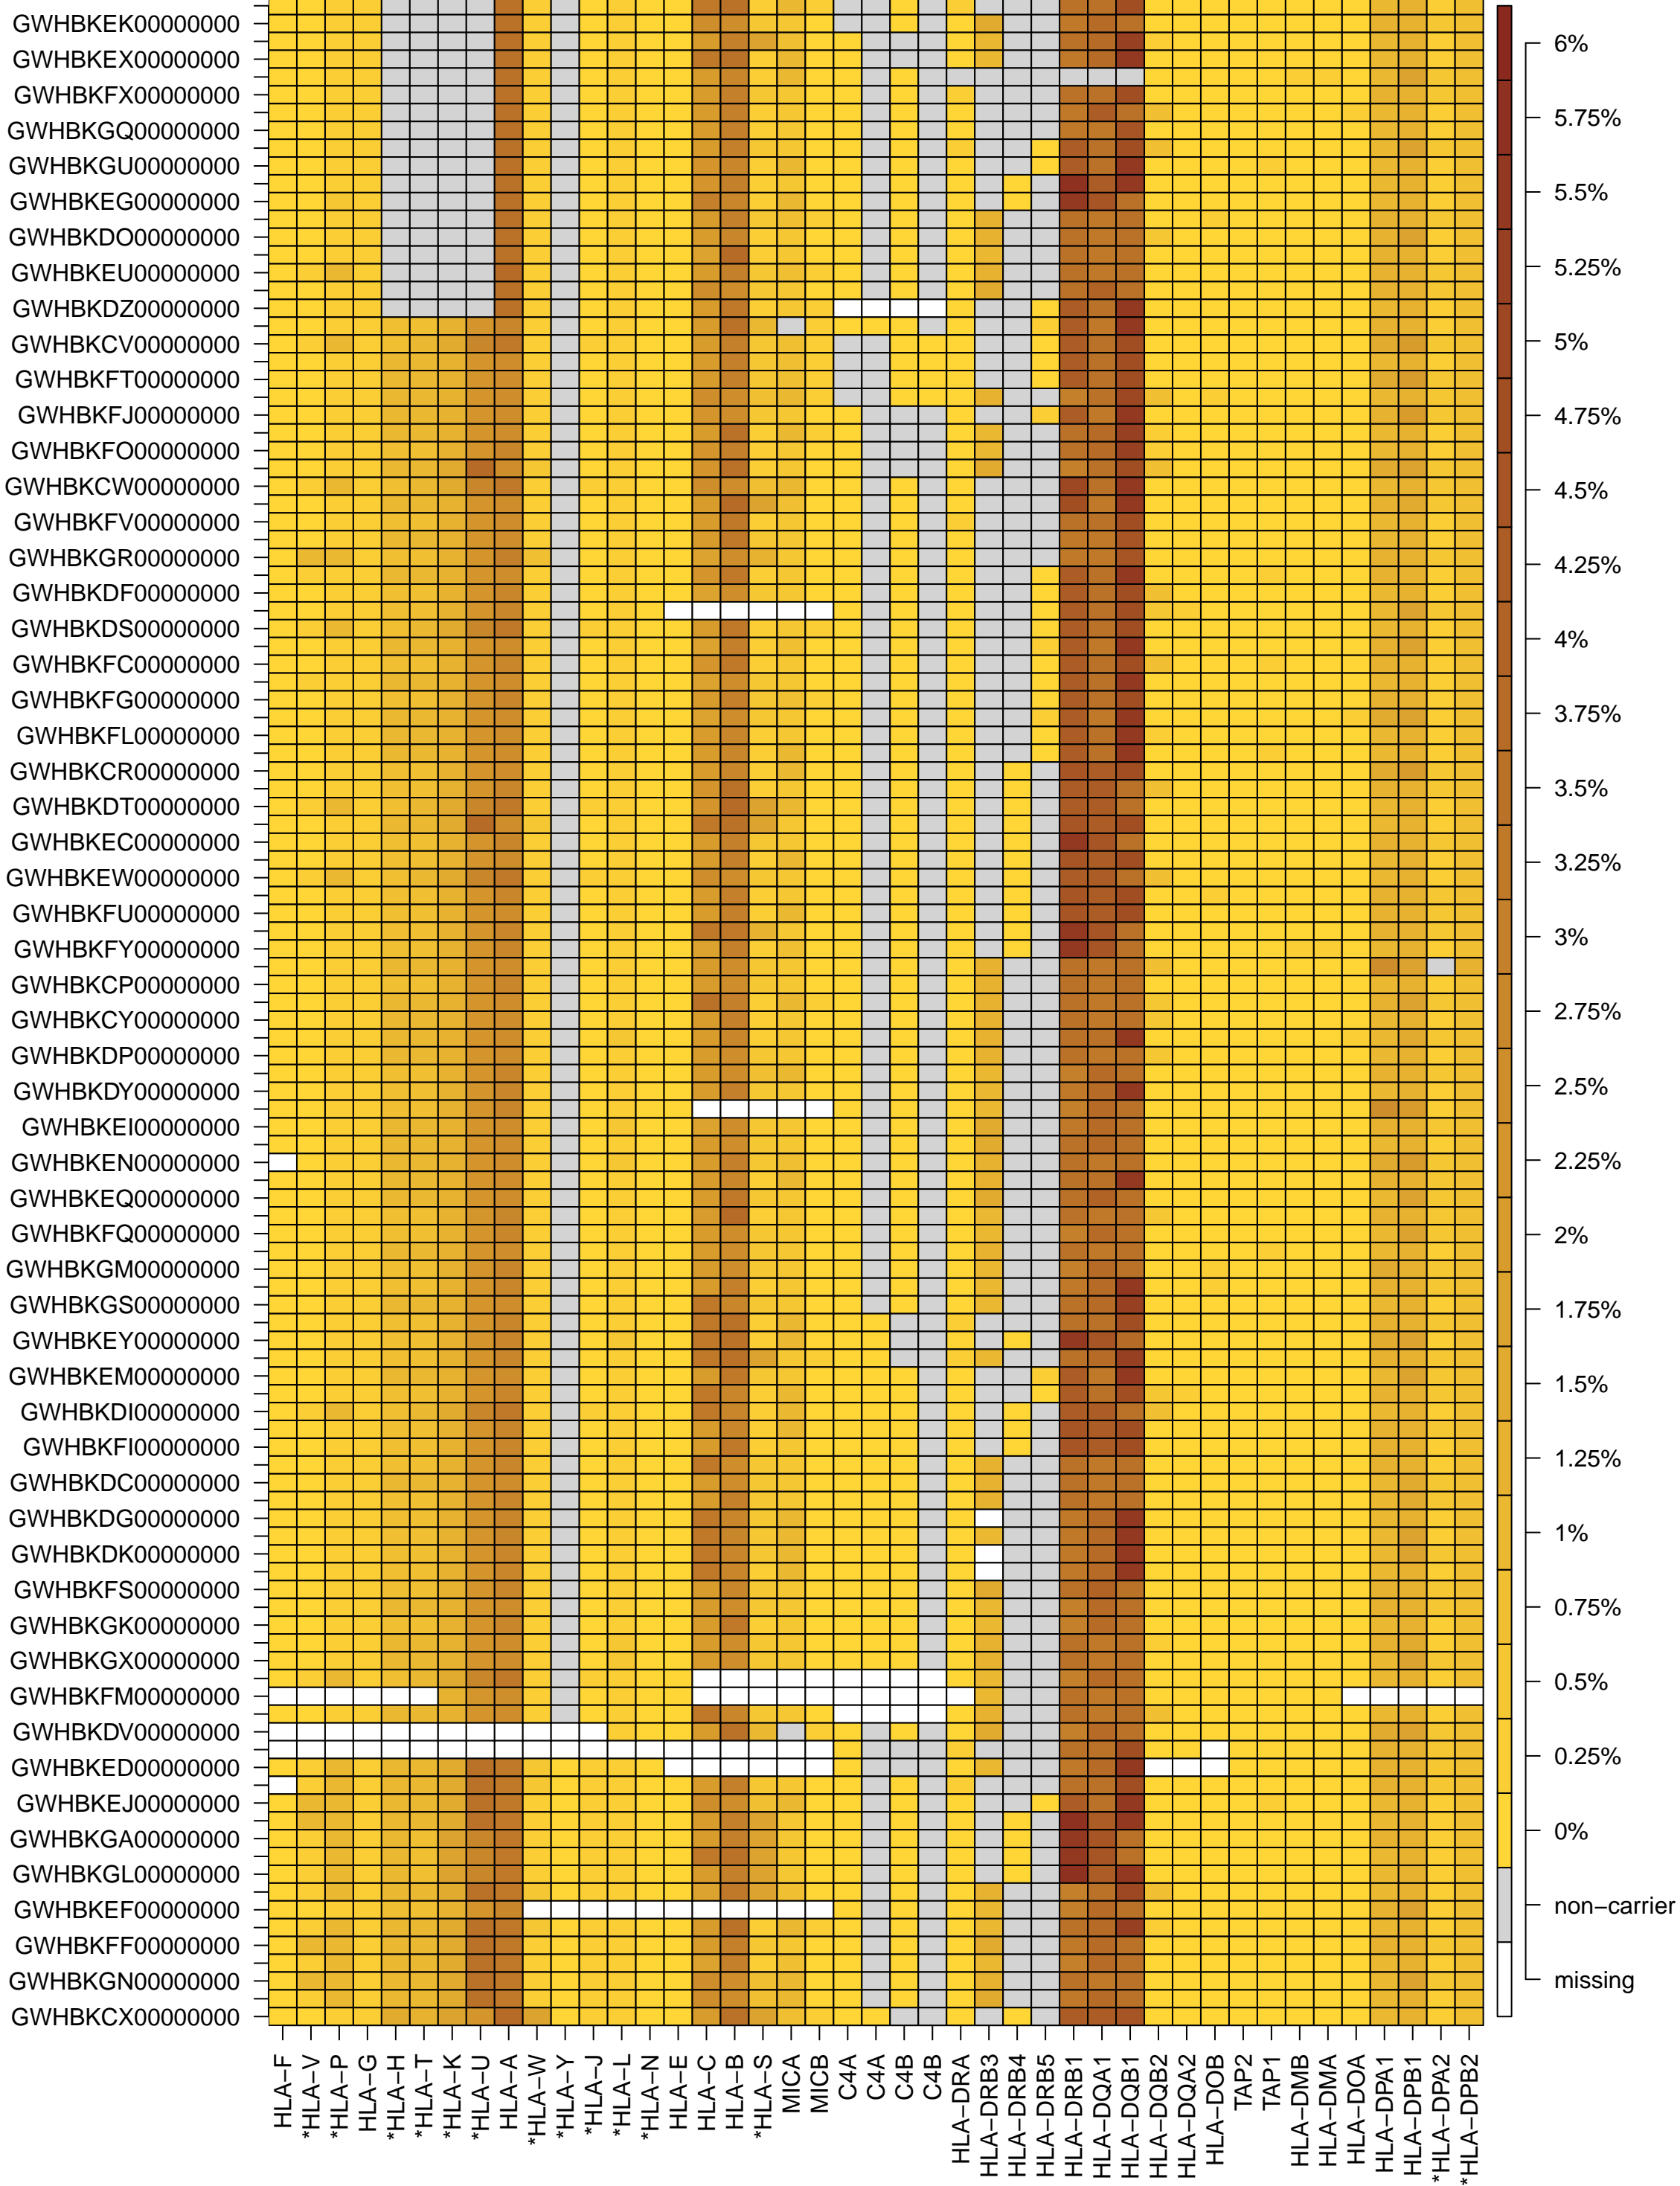

Supplement: Supplemental_code_r3.zip [file cpc-p1.HLA.cds.div.pdf › codes/hap-tab-plot/cpc-p1.HLA.cds.div.pdf]

# HPRC – HLA haplotypes

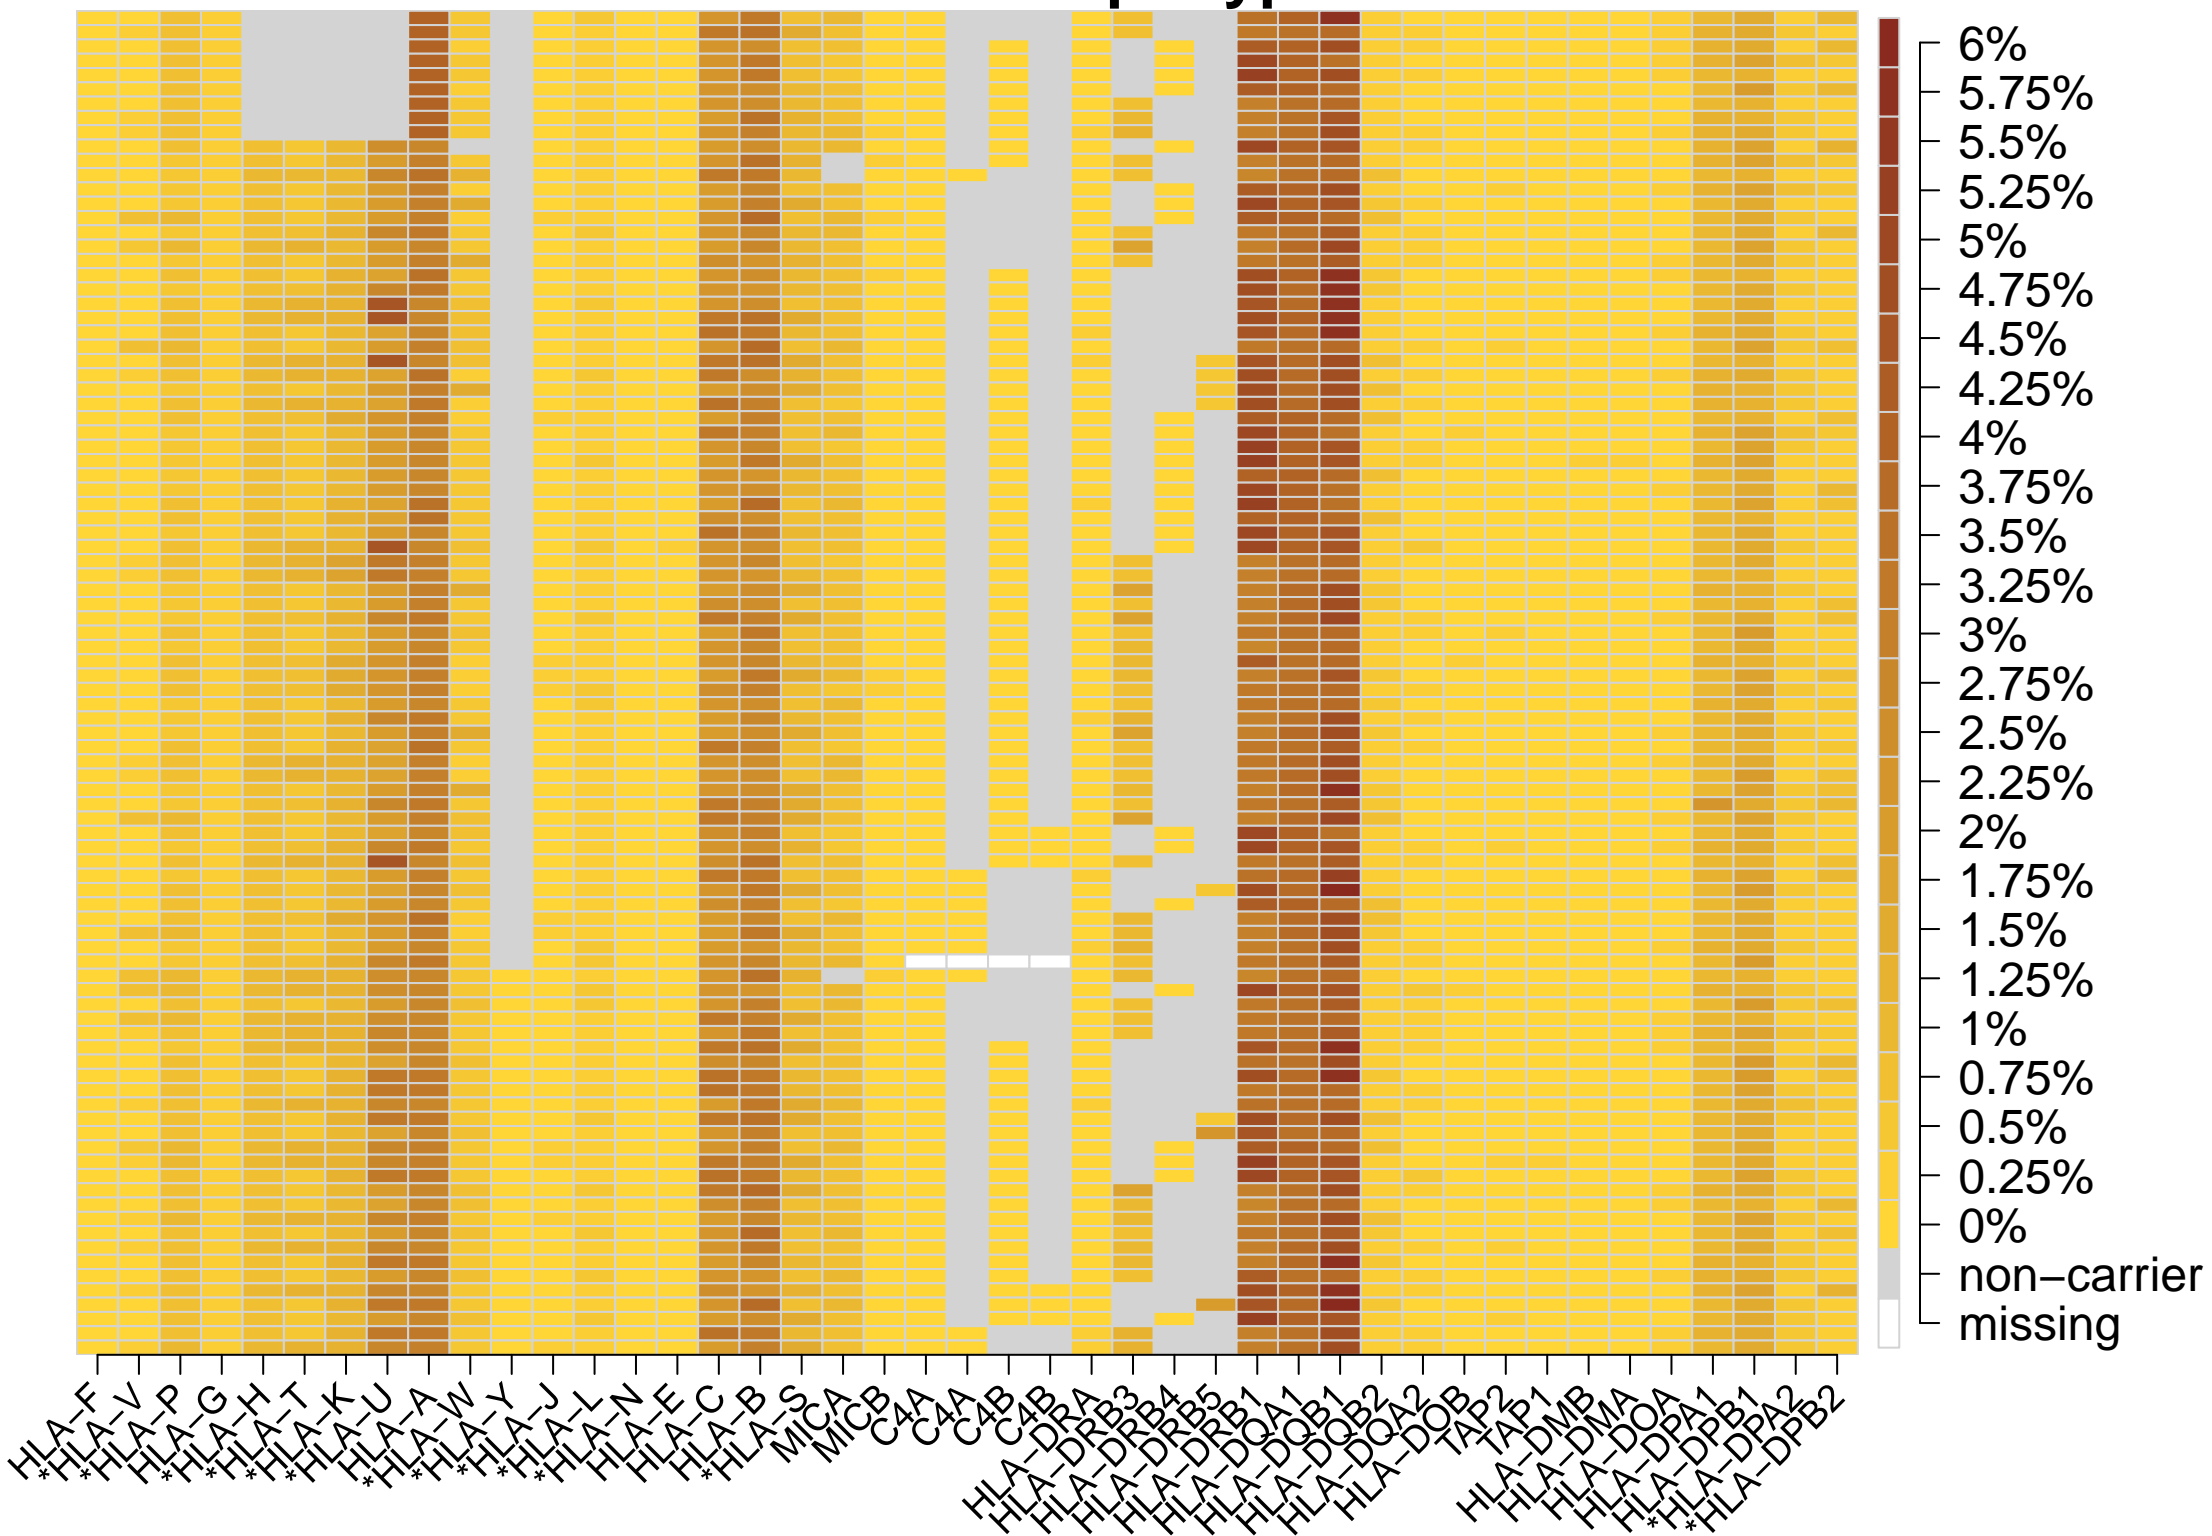

Supplement: Supplemental_code_r3.zip [file hprc.HLA.cds.div.compact.pdf › codes/hap-tab-plot/hprc.HLA.cds.div.compact.pdf]

HPRC– HLA CDS relative divergence

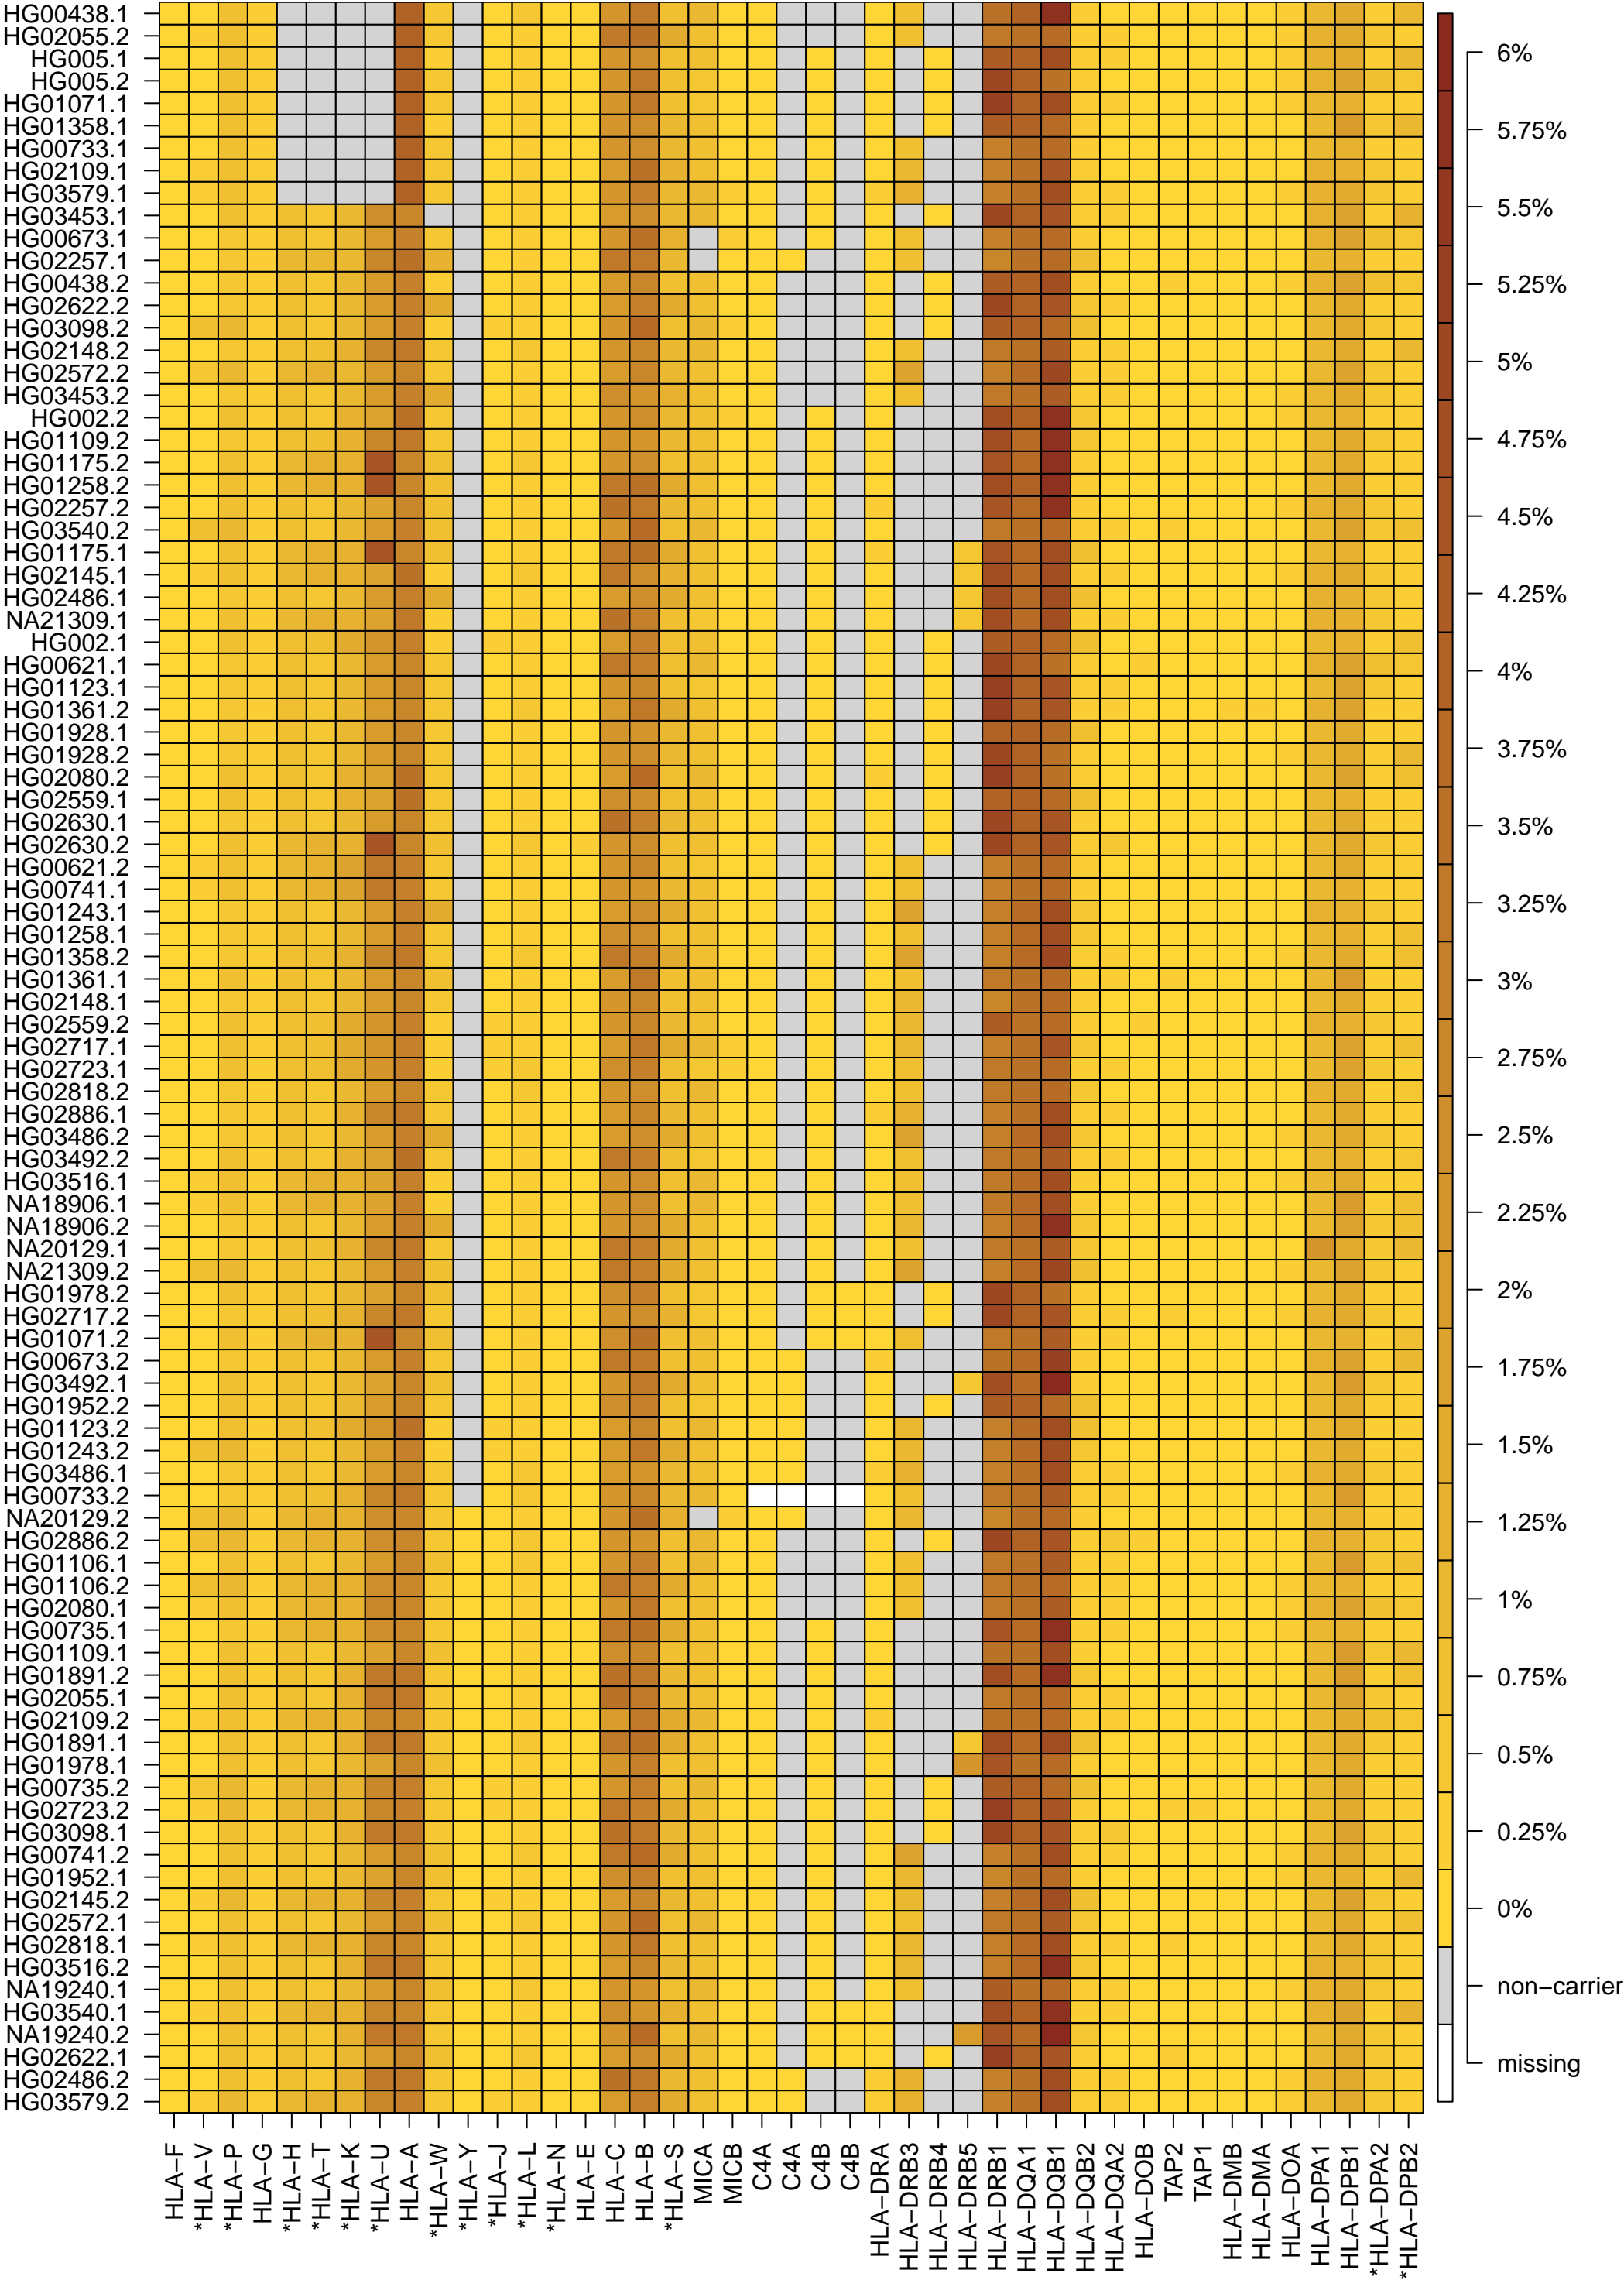

Supplement: Supplemental_code_r3.zip [file hprc.HLA.cds.div.pdf › codes/hap-tab-plot/hprc.HLA.cds.div.pdf]

# Unique gene sequence

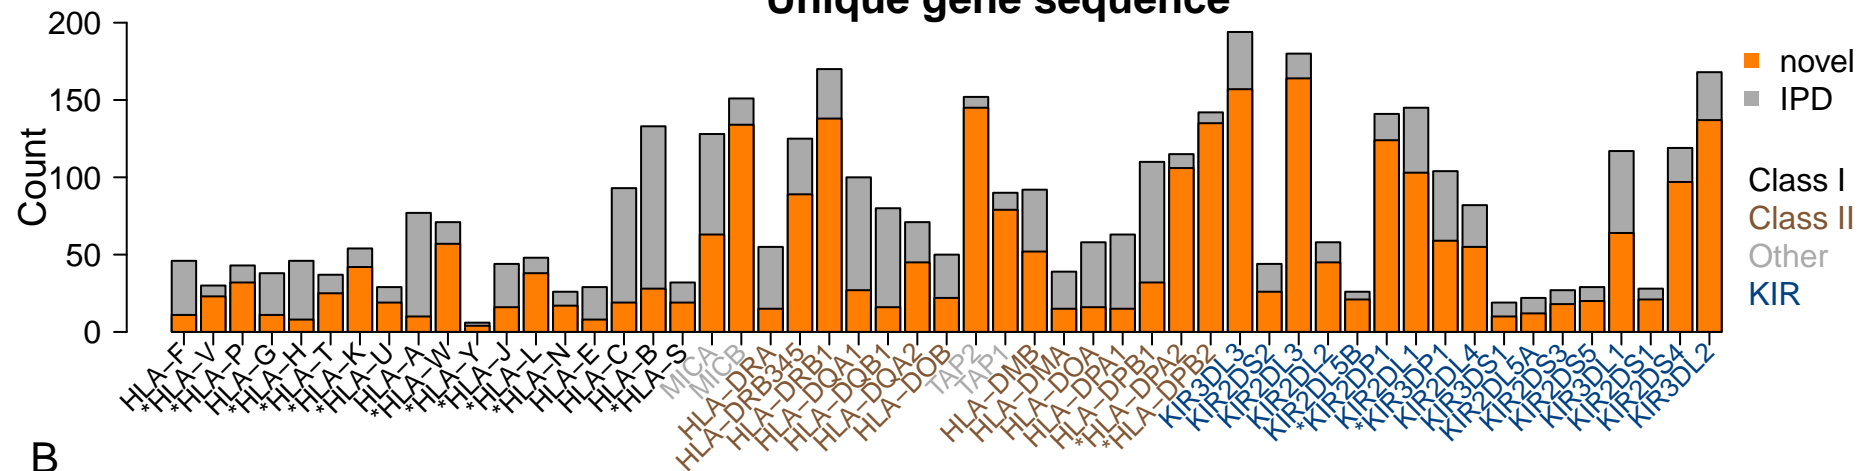

B

# Unique CDS sequence

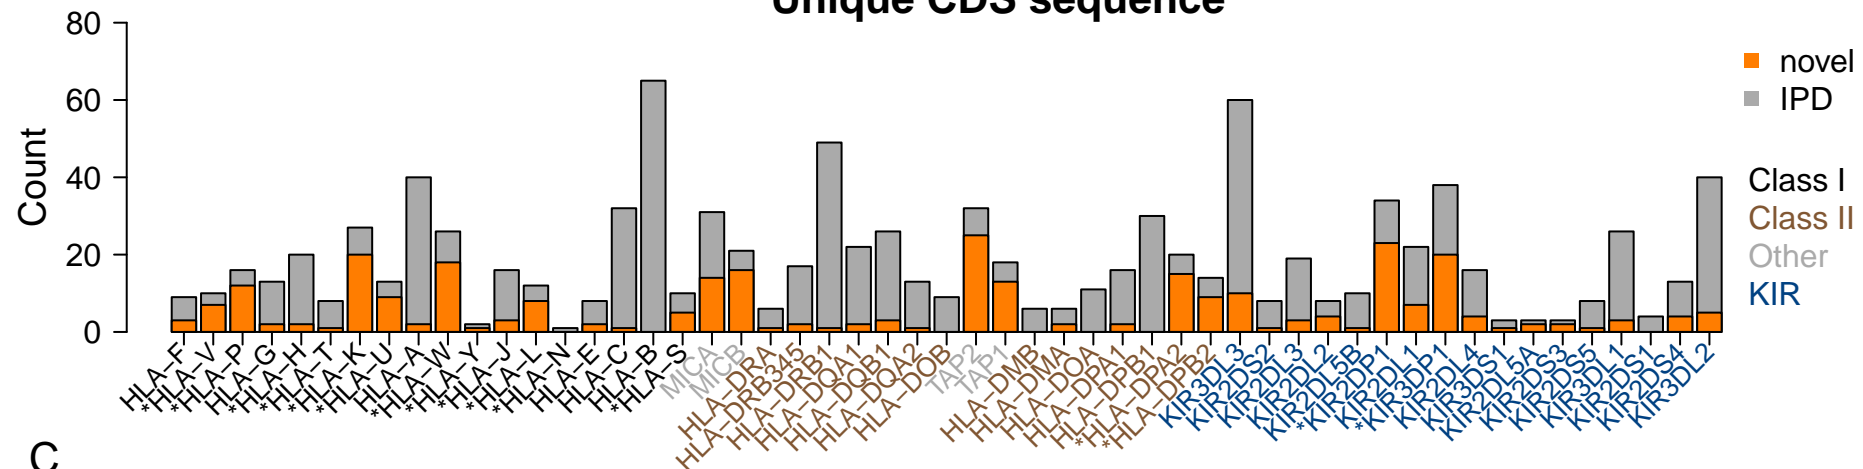

C

# Unique protein sequence

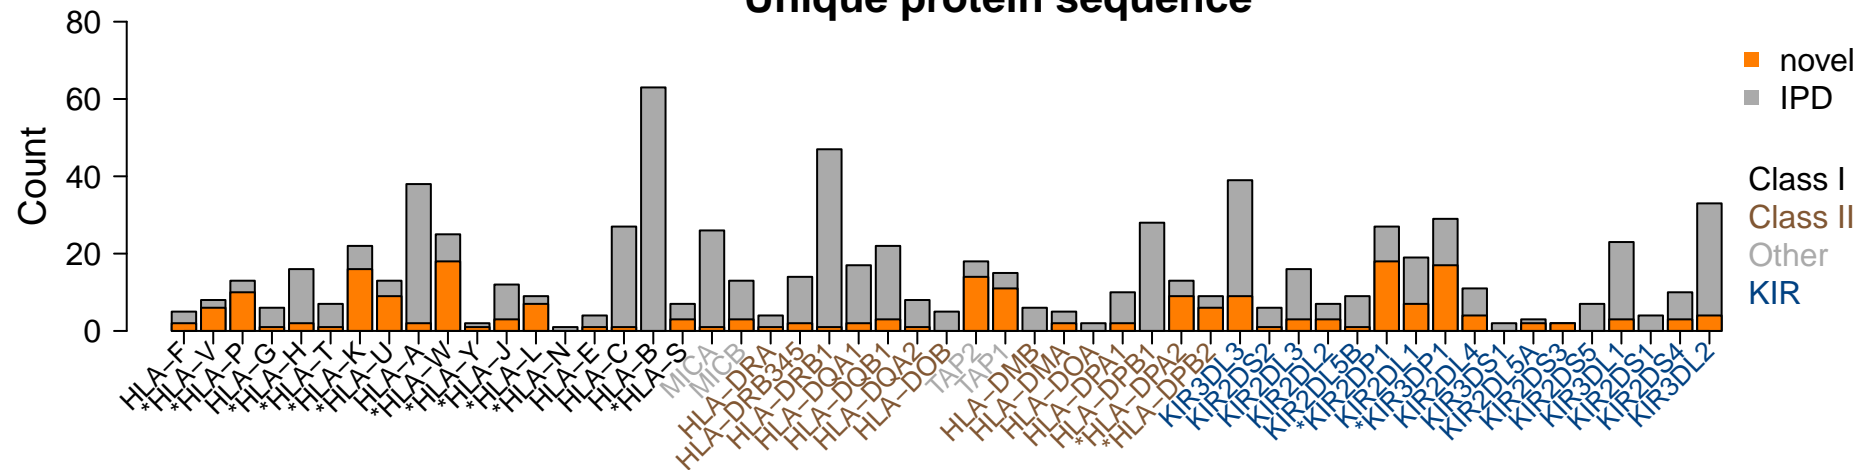

Supplement: Supplemental_code_r3.zip [file novel.allele.counts.pdf › codes/novel-alleles/novel.allele.counts.pdf]
